# Supplementary material for: Heritable Genomic Fragment Deletions and Small Indels in the Putative ENGase Gene Induced by CRISPR/Cas9 in Barley
Source: PubMed Central journal article supplement (PMC5404177; doi:10.3389/fpls.2017.00540), 2017-04-25
Supplement: Data_Sheet_1.pdf [file Data_Sheet_1.pdf]

## B351 T0 ENG1 contigs

|                    |                                             |
|--------------------|---------------------------------------------|
|                    | ACGCTTCCAGGCCGG-----CCCCATCACCGAC           |
|                    | ACGCTTCCAGGCCGGCGCCGCCA--T-CTACCCCATCACCGAC |
|                    | ACGCTTCCAGGCCGGCGCCGCCATCTCCTACCCCATCACCGAC |
|                    | ACGCTTCCAGGCCGGCGCCGCCAT-----CCCCATCACCGAC  |
| T0 amplicons       | ACGCTTCCAGGCCGGCGCCGCCATCTCCTACCCCATCACCGAC |
|                    | ACGCTTCCAGGCCGGCGCCGCCATCTCCTACCCCATCACCGAC |
|                    | ACGCTTCCAGGCCGGCGCCGCCATCT-CTACCCCATCACCGAC |
|                    | ACGCTTCCAGGCCGGCGCCGCCATCTCCTACCCCATCACCGAC |
|                    | ACGCTTCCAGGCCGGCGCCGCCATCTCCTACCCCATCACCGAC |
| wildtype reference | ACGCTTCCAGGCCGGCGCCGCCATCTCCTACCCCATCACCGAC |

**t3 PAM**

## B373 T0 ENG1 contigs

|                    |                                                    |
|--------------------|----------------------------------------------------|
|                    | GACGCTTCCAGGCCGGCGCCGCCATCTCCTACCCCATCACCGACCTCTCC |
|                    | GACGCTTCCAGGCCGGCGCCGCCATCTCCTACCCCATCACCGACCTCTCC |
|                    | GACGCTTCCAGGCCGGCGCCGCCATCTCCTACCCCATCACCGACCTCTCC |
|                    | GACGCTTCCAGGCCGGCGCCGCC-----CACCGACCTCTCC          |
|                    | GACGCTTCCAGGCCGGCGCCGCCATCTCCTACCCCATCACCGACCTCTCC |
|                    | GACGCTTCCAGGCCGGCGCCGCCATCTCCTACCCCATCACCGACCTCTCC |
|                    | GACGCTTCCAGGCCGGCGCCGCCATCTCCTACCCCATCACCGACCTCTCC |
| T0 amplicons       | GACGCTTCCAGGCCGGCGCCGCCATCTCCTACCCCATCACCGACCTCTCC |
|                    | GACGCTTCCAGGCCGGCGCCGCCATCT--TACCCCATCACCGACCTCTCC |
|                    | GACGCTTCCAGGCCGGCGCCGCCATCT-CTACCCCATCACCGACCTCTCC |
|                    | GACGCTTCCAGGCCGGCGCCGCCATCTCCTACCCCATCACCGACCTCTCC |
|                    | GACGCTTCCAGGCCGGCGCCGCCATCTCCTACCCCATCACCGACCTCTCC |
|                    | GACGCTTCCAGGCCGGCGCCGCCATCTCCTACCCCATCACCGACCTCTCC |
|                    | GACGCTTCCAGGCCGGCGCCGCCATCTCCTACCCCATCACCGACCTCTCC |
|                    | GACGCTTCCAGGCCGGCGCCGCC-----CCCCATCACCGACCTCTCC    |
|                    | GACGCTTCCAGGCCGGCGCCGCCATCTCCTACCCCATCACCGACCTCTCC |
| wildtype reference | GACGCTTCCAGGCCGGCGCCGCCATCTCCTACCCCATCACCGACCTCTCC |

**t3 PAM**





## B396 T0 ENG1 contigs

T0 amplicons  
wildtype reference

```
CGGTGATGGGGTAGGAGATGGGCGGCGC  
CGGTGATGGGGTAG---ATGGGCGGCGC  
CGGTGATGGGGTAG---ATGGGCGGCGC  
CGGTGATGGGGTAGGAGATGGGCGGCGC  
CGGTGATGGGGTAG---ATGGGCGGCGC  
CGGTGATGGGGTAGGAGATGGGCGGCGC  
CGGTGATGGGGTAGGAGATGGGCGGCGC
```

t3 PAM

## T1 ENG1 contigs B396.1 (cas9 positive)

T1 amplicons  
wildtype reference

```
CGGTGATGGGGTAG---ATGGGCGGCGC  
CGGTGATGGGGTAG---ATGGGCGGCGC  
CGGTGATGGGGTAG---ATGGGCGGCGC  
CGGTGATGGGGTAG---ATGGGCGGCGC  
CGGTGATGGGGTAG---ATGGGCGGCGC  
CGGTGATGGGGTAG---ATGGGCGGCGC  
CGGTGATGGGGTAGGAGATGGGCGGCGC
```

t3 PAM

## T1 ENG1 contigs B396.2 (cas9 negative)

T1 amplicons  
wildtype reference

```
CGGTGATGGGGTAGGAGATGGGCGGCGC  
CGGTGATGGGGTAG---ATGGGCGGCGC  
CGGTGATGGGGTAG---ATGGGCGGCGC  
CGGTGATGGGGTAGGAGATGGGCGGCGC  
CGGTGATGGGGTAG---ATGGGCGGCGC  
CGGTGATGGGGTAG---ATGGGCGGCGC  
CGGTGATGGGGTAGGAGATGGGCGGCGC
```

t3 PAM

## B410 T0 ENG1 contigs

|              |                                                                                                                                                                                                                                                                                                                                                                                                                                                                                                                                                                                                                                                                                                                                  |
|--------------|----------------------------------------------------------------------------------------------------------------------------------------------------------------------------------------------------------------------------------------------------------------------------------------------------------------------------------------------------------------------------------------------------------------------------------------------------------------------------------------------------------------------------------------------------------------------------------------------------------------------------------------------------------------------------------------------------------------------------------|
| T0 amplicons | GCCCATCT--T--CCCATCACCGACCTCTCCGCGCTCGCCTCCCGCTCCTACCTCTCCGAGGCCTCCAACCTCCACCTCCCCTTCAACCGCGCCTCCA--GCCGCT<br>GCCCATCTC-TACCCCATCACCGACCTCTCCGCGCTCGCCTCCCGCTCCTACCTCTCCGAGGCCTCCAACCTCCACCTCCCCTTCAACCGCGCCTCCA--GCCGCT<br>GCCCATCTC-TACCCCATCACCGACCTCTCCGCGCTCGCCTCCCGCTCCTACCTCTCCGAGGCCTCCAACCTCCACCTCCCCTTCAACCGCGCCTCCA--GCCGCT<br>GCCCATCT--T--CCCATCACCGACCTCTCCGCGCTCGCCTCCCGCTCCTACCTCTCCGAGGCCTCCAACCTCCACCTCCCCTTCAACCGCGCCTCCA <b>T</b> GCCGCT<br>GCCCATCTC-TACCCCATCACCGACCTCTCCGCGCTCGCCTCCCGCTCCTACCTCTCCGAGGCCTCCAACCTCCACCTCCCCTTCAACCGCGCCTCCA--GCCGCT<br>wildtype reference <b>GCCCATCTC<b>T</b>TACCCCATCACCGACCTCTCCGCGCTCGCCTCCCGCTCCTACCTCTCCGAGGCCTCCAACCTCCACCTCCCCTTCAACCGCGCCTCCA<b>C</b>-GCCGCT</b> |
|              | <div style="display: flex; justify-content: space-between; width: 100%;"> <span>t3 PAM</span> <span>tA PAM</span> </div>                                                                                                                                                                                                                                                                                                                                                                                                                                                                                                                                                                                                         |

## B411 T0 ENG1 contigs

|              |                                                                                                                                                                                                                                                                                                                                                                                                                                                                                                                                                                                                         |
|--------------|---------------------------------------------------------------------------------------------------------------------------------------------------------------------------------------------------------------------------------------------------------------------------------------------------------------------------------------------------------------------------------------------------------------------------------------------------------------------------------------------------------------------------------------------------------------------------------------------------------|
| T0 amplicons | CGGCGGGA-----AGCGTCGAACGGCGG<br>CGGCGGGA-----AGCGTCGAACGGCGG<br>CGGCGGGA-----AGCGTCGAACGGCGG<br>CGGCGGGA-----AGCGTCGAACGGCGG<br>CGGCGGGA-----AGCGTCGAACGGCGG<br>CGGCGGGAGCGGCGCCCGGGAGAGGGGAGCGGC-----AGATGGGCGGCGCGGCTGGAAGCGTCGAACGGCGG<br>CGGCGGGAGCGGCGCCCGGGAGAGGGGAGCGGC-----AGATGGGCGGCGCGGCTGGAAGCGTCGAACGGCGG<br>CGGCGGGAGCGGCGCCCGGGAGAGGGGAGCGGC-----AGATGGGCGGCGCGGCTGGAAGCGTCGAACGGCGG<br>wildtype reference <b>CGGCGGGAGCGGCGCCCGGGAGAGGGGAGCGGC<b>CTGGAGGCGCGGTTGAAGGGGAGGTGGAAGTTGGAGGCCTCGGAGAGGTAGGAGCGGGAGGCGAGCGCGGAGAGGTGCGT</b>GATGGGGTAGGAGATGGGCGGCGCGGCTGGAAGCGTCGAACGGCGG</b> |
|              | <div style="display: flex; justify-content: space-between; width: 100%;"> <span>tA PAM</span> <span>t3 PAM</span> </div>                                                                                                                                                                                                                                                                                                                                                                                                                                                                                |

## T1 ENG1 contigs B411.1 (cas9 negative)

|              |                                                                                                                                                                                                                                                                                                                                                                                                                                                                                                                                                                                                                                                                                                                                                         |
|--------------|---------------------------------------------------------------------------------------------------------------------------------------------------------------------------------------------------------------------------------------------------------------------------------------------------------------------------------------------------------------------------------------------------------------------------------------------------------------------------------------------------------------------------------------------------------------------------------------------------------------------------------------------------------------------------------------------------------------------------------------------------------|
| T1 amplicons | :GCCGTTGACGCT-----TCCCGCCGCGG<br>:GCCGTTGACGCT-----TCCCGCCGCGG<br>:GCCGTTGACGCTTCCAGGCCGGCGCCGCCATCT-----GCCGCTCCCCCTCCCGGGGCGCGCTCCCGCCGCGG<br>:GCCGTTGACGCTTCCAGGCCGGCGCCGCCATCT-----GCCGCTCCCCCTCCCGGGGCGCGCTCCCGCCGCGG<br>:GCCGTTGACGCTTCCAGGCCGGCGCCGCCATCT-----GCCGCTCCCCCTCCCGGGGCGCGCTCCCGCCGCGG<br>:GCCGTTGACGCTTCCAGGCCGGCGCCGCCATCT-----GCCGCTCCCCCTCCCGGGGCGCGCTCCCGCCGCGG<br>:GCCGTTGACGCTTCCAGGCCGGCGCCGCCATCT-----GCCGCTCCCCCTCCCGGGGCGCGCTCCCGCCGCGG<br>:GCCGTTGACGCTTCCAGGCCGGCGCCGCCATCT-----GCCGCTCCCCCTCCCGGGGCGCGCTCCCGCCGCGG<br>wildtype reference <b>:GCCGTTGACGCTTCCAGGCCGGCGCCGCCATCT<b>CCTACCCCATCACCGACCTCTCCGCGCTCGCCTCCCGCTCCTACCTCTCCGAGGCCTCCAACCTCCACCTCCCCTTCAACCGCGCCTCCAC</b>GCCGCTCCCCCTCCCGGGGCGCGCTCCCGCCGCGG</b> |
|              | <div style="display: flex; justify-content: space-between; width: 100%;"> <span>t3 PAM</span> <span>tA PAM</span> </div>                                                                                                                                                                                                                                                                                                                                                                                                                                                                                                                                                                                                                                |

## T1 ENG1 contigs B411.2 (cas9 negative)

|                    |                                                                                                                                             |
|--------------------|---------------------------------------------------------------------------------------------------------------------------------------------|
|                    | AGGCCGGCGCGCCCATCT-----GCCGCTCCCCTCTCCCAGGGCGC/                                                                                             |
|                    | AGGCCGGCGCGCCCATCT-----GCCGCTCCCCTCTCCCAGGGCGC/                                                                                             |
|                    | AGGCCGGCGCGCCCATCT-----GCCGCTCCCCTCTCCCAGGGCGC/                                                                                             |
|                    | AGGCCGGCGCGCCCATCT-----GCCGCTCCCCTCTCCCAGGGCGC/                                                                                             |
| T1 amplicons       | AGGCCGGCGCGCCCATCT-----GCCGCTCCCCTCTCCCAGGGCGC/                                                                                             |
|                    | AGGCCGGCGCGCCCATCT-----GCCGCTCCCCTCTCCCAGGGCGC/                                                                                             |
|                    | AGGCCGGCGCGCCCATCT-----GCCGCTCCCCTCTCCCAGGGCGC/                                                                                             |
|                    | AGGCCGGCGCGCCCATCT-----GCCGCTCCCCTCTCCCAGGGCGC/                                                                                             |
|                    | AGGCCGGCGCGCCCATCT-----GCCGCTCCCCTCTCCCAGGGCGC/                                                                                             |
|                    | AGGCCGGCGCGCCCATCT-----GCCGCTCCCCTCTCCCAGGGCGC/                                                                                             |
|                    | AGGCCGGCGCGCCCATCT-----GCCGCTCCCCTCTCCCAGGGCGC/                                                                                             |
| wildtype reference | AGGCCGGCGCGCCCATCT <u>CCTACCCCATCACCGACCTCTCCGCGCTCGCCTCCCGCTCTACCTCTCCGAGGCCTCCA</u> ACTTCCACCTCCCTTCAACCGGGCTCCACGCCGCTCCCCTCTCCCAGGGCGC/ |
|                    | t3 PAM <span style="float: right;">tA PAM</span>                                                                                            |

## B413 T0 ENG1 contigs

|                    |                                                                                                                           |
|--------------------|---------------------------------------------------------------------------------------------------------------------------|
|                    | AGGGGAGCGGCG-----AGATGGGCGG                                                                                               |
|                    | AGGGGAGCGGCG-----AGATGGGCGG                                                                                               |
|                    | AGGGGAGCGGCG-----AGATGGGCGG                                                                                               |
|                    | AGGGGAGCGGCG-----AGATGGGCGG                                                                                               |
| T0 amplicons       | AGGGGAGCGGCG-----AGATGGGCGG                                                                                               |
|                    | AGGGGAGCGGCG-----AGATGGGCGG                                                                                               |
|                    | AGGGGAGCGGCG-----AGATGGGCGG                                                                                               |
|                    | AGGGGAGCGGCG-----AGATGGGCGG                                                                                               |
|                    | AGGGGAGCGGCG-----AGATGGGCGG                                                                                               |
| wildtype reference | AGGGGAGCGGCG <u>TGGAGGCGCGGTTGAAGGGGAGGTGGAAGTTGGAGGCCTCGGAGAGGTAGGAGCGGGAGGCGAGCGCGGAGAGGTCGGTGATGGGGTAGG</u> AGATGGGCGG |
|                    | tA PAM <span style="float: right;">t3 PAM</span>                                                                          |

## T1 ENG1 contigs B413.1

|                    |                                                                                                                                      |
|--------------------|--------------------------------------------------------------------------------------------------------------------------------------|
|                    | GGAGAGGGGAGC---TGGAGGCGCGGTTGAAGGGGAGGTGGAAGTTGGAGGCCTCGGAGAGGTAGGAGCGGGAGGCGAGCGCGGAGAGGTCGGTGATGGGGTA--AGATGGGCGGCGCCGG/           |
|                    | GGAGAGGGGAGC---TGGAGGCGCGGTTGAAGGGGAGGTGGAAGTTGGAGGCCTCGGAGAGGTAGGAGCGGGAGGCGAGCGCGGAGAGGTCGGTGATGGGGTA--AGATGGGCGGCGCCGG/           |
|                    | GGAGAGGGGAGC---TGGAGGCGCGGTTGAAGGGGAGGTGGAAGTTGGAGGCCTCGGAGAGGTAGGAGCGGGAGGCGAGCGCGGAGAGGTCGGTGATGGGGTA--AGATGGGCGGCGCCGG/           |
| T1 amplicons       | GGAGAGGGGAGC---TGGAGGCGCGGTTGAAGGGGAGGTGGAAGTTGGAGGCCTCGGAGAGGTAGGAGCGGGAGGCGAGCGCGGAGAGGTCGGTGATGGGGTA--AGATGGGCGGCGCCGG/           |
|                    | GGAGAGGGGAGC---TGGAGGCGCGGTTGAAGGGGAGGTGGAAGTTGGAGGCCTCGGAGAGGTAGGAGCGGGAGGCGAGCGCGGAGAGGTCGGTGATGGGGTA--AGATGGGCGGCGCCGG/           |
| wildtype reference | GGAGAGGGGAGC <u>GGCGTGGAGGCGCGGTTGAAGGGGAGGTGGAAGTTGGAGGCCTCGGAGAGGTAGGAGCGGGAGGCGAGCGCGGAGAGGTCGGTGATGGGGTAGG</u> AGATGGGCGGCGCCGG/ |
|                    | tA PAM <span style="float: right;">t3 PAM</span>                                                                                     |

## T1 ENG1 contigs B413.2 (cas9 negative)

T1 amplicons

```

AGAGGGGAGCGGCG-----AGATGGGCGGCGCCGGC|
AGAGGGGAGCGGCG-----AGATGGGCGGCGCCGGC|
AGAGGGGAGCGGCG-----AGATGGGCGGCGCCGGC|
AGAGGGGAGCGGCG-----AGATGGGCGGCGCCGGC|
AGAGGGGAGCGGCG-----AGATGGGCGGCGCCGGC|
AGAGGGGAGCGGCG-----AGATGGGCGGCGCCGGC|
AGAGGGGAGCGGCG-----AGATGGGCGGCGCCGGC|
AGAGGGGAGCGGCG-----AGATGGGCGGCGCCGGC|
AGAGGGGAGCGGCG-----AGATGGGCGGCGCCGGC|
AGAGGGGAGCGGCG-----AGATGGGCGGCGCCGGC|
wildtype reference AGAGGGGAGCGGCGTGGAGGCGCGGTTGAAGGGGAGGTGGAAGTTGGAGGCCTCGGAGAGGTAGGAGCGGGAGGCGAGCGCGGAGAGGTGGTGGATGGGGTAGGAGATGGGCGGCGCCGGC|

```

tA PAM t3 PAM

## B420 T0 ENG1 contigs

T0 amplicon

```

GGCGCCGCCCACT-----CGCCGCTCCCCCTCT|
wildtype reference GGCGCCGCCCACTCCTACCCCATCACCGACCTCTCCGCGCTCGCCTCCCGCTCCTACCTCTCCGAGGCCTCCAACCTCCACCTCCCCTCAACCGCGCCTCCACGCGGCTCCCCCTCT|

```

t3 PAM tA PAM

T0 amplicons

```

GCCGCCCATCTT----CCCATCACCGACCTCTCCGCGCTCGCCTCCCGCTCCTACCTCTCCGAGGCCTCCAACCTCCACCTCCCCTCAACCGCGCCTCCA-GCCGCTCC|
GCCGCCCATCTT----CCCATCACCGACCTCTCCGCGCTCGCCTCCCGCTCCTACCTCTCCGAGGCCTCCAACCTCCACCTCCCCTCAACCGCGCCTCCA-GCCGCTCC|
GCCGCCCATCTT----CCCATCACCGACCTCTCCGCGCTCGCCTCCCGCTCCTACCTCTCCGAGGCCTCCAACCTCCACCTCCCCTCAACCGCGCCTCCA-GCCGCTCC|
GCCGCCCATCTT----CCCATCACCGACCTCTCCGCGCTCGCCTCCCGCTCCTACCTCTCCGAGGCCTCCAACCTCCACCTCCCCTCAACCGCGCCTCCA-GCCGCTCC|
wildtype reference GCCGCCCATCTCCTACCCCATCACCGACCTCTCCGCGCTCGCCTCCCGCTCCTACCTCTCCGAGGCCTCCAACCTCCACCTCCCCTCAACCGCGCCTCCACGCCGCTCC|

```

t3 PAM tA PAM

T0 amplicon

```

GAGCGGC-TGGAGGCGCGGTTGAAGGGGAGGTGGAAGTTGGAGGCCTCGGAGAGGTAGGAGCGGGAGGCGAGCGCGGAGAGGTGGTGGATGGGGTAG-----GGGCGGCG|
wildtype reference GAGCGGCGTGGAGGCGCGGTTGAAGGGGAGGTGGAAGTTGGAGGCCTCGGAGAGGTAGGAGCGGGAGGCGAGCGCGGAGAGGTGGTGGATGGGGTAGGAGATGGGCGGCG|

```

tA PAM t3 PAM

## T1 ENG1 contigs B420.1

T1 amplicons

```

GAGCGGCGGTGGAGGCGCGGTTGAAGGGGAGGTGGAAGTTGGAGGCCTCGGAGAGGTAGGAGCGGGAGGCGAGCGCGGAGAGGTGGTGGATGGGA----AGATGGGCGGC|
GAGCGGCGGTGGAGGCGCGGTTGAAGGGGAGGTGGAAGTTGGAGGCCTCGGAGAGGTAGGAGCGGGAGGCGAGCGCGGAGAGGTGGTGGATGGGA----AGATGGGCGGC|
GAGCGGCGGTGGAGGCGCGGTTGAAGGGGAGGTGGAAGTTGGAGGCCTCGGAGAGGTAGGAGCGGGAGGCGAGCGCGGAGAGGTGGTGGATGGGA----AGATGGGCGGC|
GAGCGGCGGTGGAGGCGCGGTTGAAGGGGAGGTGGAAGTTGGAGGCCTCGGAGAGGTAGGAGCGGGAGGCGAGCGCGGAGAGGTGGTGGATGGGA----AGATGGGCGGC|
GAGCGGCGGTGGAGGCGCGGTTGAAGGGGAGGTGGAAGTTGGAGGCCTCGGAGAGGTAGGAGCGGGAGGCGAGCGCGGAGAGGTGGTGGATGGGA----AGATGGGCGGC|
GAGCGGCGGTGGAGGCGCGGTTGAAGGGGAGGTGGAAGTTGGAGGCCTCGGAGAGGTAGGAGCGGGAGGCGAGCGCGGAGAGGTGGTGGATGGGA----AGATGGGCGGC|
wildtype reference GAGCGGCG-TGGAGGCGCGGTTGAAGGGGAGGTGGAAGTTGGAGGCCTCGGAGAGGTAGGAGCGGGAGGCGAGCGCGGAGAGGTGGTGGATGGGTAGGAGATGGGCGGCG|

```

tA PAM t3 PAM

## T1 ENG1 contigs B420.2 (cas9 negative)

```

3GAGCGGC--TGGAGGCGCGGTTGAAGGGGAGGTGGAAGTTGGAGGCCTCGGAGAGGTAGGAGCGGGAGGCGAGCGCGGAGAGGTCGGTGATGGGGTAGGAGATGGGCGGCG(
3GAGCGGC--TGGAGGCGCGGTTGAAGGGGAGGTGGAAGTTGGAGGCCTCGGAGAGGTAGGAGCGGGAGGCGAGCGCGGAGAGGTCGGTGATGGGGTAGGAGATGGGCGGCG(
3GAGCGGC--TGGAGGCGCGGTTGAAGGGGAGGTGGAAGTTGGAGGCCTCGGAGAGGTAGGAGCGGGAGGCGAGCGCGGAGAGGTCGGTGATGGGGTAGGAGATGGGCGGCG(
3GAGCGGC--TGGAGGCGCGGTTGAAGGGGAGGTGGAAGTTGGAGGCCTCGGAGAGGTAGGAGCGGGAGGCGAGCGCGGAGAGGTCGGTGATGGGGTAGGAGATGGGCGGCG(
3GAGCGGCGGTGGAGGCGCGGTTGAAGGGGAGGTGGAAGTTGGAGGCCTCGGAGAGGTAGGAGCGGGAGGCGAGCGCGGAGAGGTCGGTGATGGGA----AGATGGGCGGCG(
3GAGCGGC--TGGAGGCGCGGTTGAAGGGGAGGTGGAAGTTGGAGGCCTCGGAGAGGTAGGAGCGGGAGGCGAGCGCGGAGAGGTCGGTGATGGGGTAGGAGATGGGCGGCG(
3GAGCGGCGGTGGAGGCGCGGTTGAAGGGGAGGTGGAAGTTGGAGGCCTCGGAGAGGTAGGAGCGGGAGGCGAGCGCGGAGAGGTCGGTGATGGGA----AGATGGGCGGCG(
3GAGCGGCGGTGGAGGCGCGGTTGAAGGGGAGGTGGAAGTTGGAGGCCTCGGAGAGGTAGGAGCGGGAGGCGAGCGCGGAGAGGTCGGTGATGGGA----AGATGGGCGGCG(
3GAGCGGCGGTGGAGGCGCGGTTGAAGGGGAGGTGGAAGTTGGAGGCCTCGGAGAGGTAGGAGCGGGAGGCGAGCGCGGAGAGGTCGGTGATGGGA----AGATGGGCGGCG(
3GAGCGGCG-TGGAGGCGCGGTTGAAGGGGAGGTGGAAGTTGGAGGCCTCGGAGAGGTAGGAGCGGGAGGCGAGCGCGGAGAGGTCGGTGATGGGGTAGGAGATGGGCGGCG(

```

tA PAM t3 PAM

## B421 T0 ENG1 contigs

|                    |                                                                                                                                                                                                                                                                                                                                                                                                                                                                                                                                                                                                                                                                                                                                                                                                  |
|--------------------|--------------------------------------------------------------------------------------------------------------------------------------------------------------------------------------------------------------------------------------------------------------------------------------------------------------------------------------------------------------------------------------------------------------------------------------------------------------------------------------------------------------------------------------------------------------------------------------------------------------------------------------------------------------------------------------------------------------------------------------------------------------------------------------------------|
| T0 amplicons       | <pre> CCCATCTT----CCCATCACCGACCTCTCCGCGCTCGCCTCCCGTCTCTACCTCTCCGAGGCCTCCAACCTCCACCTCCCCTTCAACCGCGCCTCCATCGCCGCTC( CCCATCTT----CCCATCACCGACCTCTCCGCGCTCGCCTCCCGTCTCTACCTCTCCGAGGCCTCCAACCTCCACCTCCCCTTCAACCGCGCCTCCATCGCCGCTC( CCCATCTT----CCCATCACCGACCTCTCCGCGCTCGCCTCCCGTCTCTACCTCTCCGAGGCCTCCAACCTCCACCTCCCCTTCAACCGCGCCTCCA-CGCCGCTC( CCCATCTT----CCCATCACCGACCTCTCCGCGCTCGCCTCCCGTCTCTACCTCTCCGAGGCCTCCAACCTCCACCTCCCCTTCAACCGCGCCTCCATCGCCGCTC( CCCATCTT----CCCATCACCGACCTCTCCGCGCTCGCCTCCCGTCTCTACCTCTCCGAGGCCTCCAACCTCCACCTCCCCTTCAACCGCGCCTCCATCGCCGCTC( CCCATCTT----CCCATCACCGACCTCTCCGCGCTCGCCTCCCGTCTCTACCTCTCCGAGGCCTCCAACCTCCACCTCCCCTTCAACCGCGCCTCCA-CGCCGCTC( CCCATCTT----CCCATCACCGACCTCTCCGCGCTCGCCTCCCGTCTCTACCTCTCCGAGGCCTCCAACCTCCACCTCCCCTTCAACCGCGCCTCCA-CGCCGCTC( </pre> |
| wildtype reference | <pre> CCCATCT<b>CCTAC</b>CCCATCACCGACCTCTCCGCGCTCGCCTCCCGTCTCTACCTCTCCGAGGCCTCCAACCTCCACCTCCCCTTCAACCGCGCCTCCA-CGCCGCTC( </pre>                                                                                                                                                                                                                                                                                                                                                                                                                                                                                                                                                                                                                                                                  |

t3 PAM tA PAM



## B422 T0 ENG1 contigs

|                    |  |                                    |
|--------------------|--|------------------------------------|
|                    |  | :GGAGAGGGGAGCGGC--TGGAGGCGCGGTTGAA |
|                    |  | :GGAGAGGGGAGCGGC--TGGAGGCGCGGTTGAA |
|                    |  | :GGAGAGGGGAGCGGC--TGGAGGCGCGGTTGAA |
| T0 amplicons       |  | :GGAGAGGGGAGCGGCG-TGGAGGCGCGGTTGAA |
|                    |  | :GGAGAGGGGAGCGGCG-TGGAGGCGCGGTTGAA |
|                    |  | :GGAGAGGGGAGCGGCGTGGAGGCGCGGTTGAA  |
| wildtype reference |  | :GGAGAGGGGAGCGGCG-TGGAGGCGCGGTTGAA |

**tA PAM**

## B423 T0 ENG1 contigs

|                    |  |                                                                                                                      |
|--------------------|--|----------------------------------------------------------------------------------------------------------------------|
|                    |  | :GGGAGCGGC-TGGAGGCGCGGTTGAAGGGGAGGTGGAAGTTGGAGGCCTCGGAGAGGTAGGAGCGGGAGGCGAGCGCGGAGAGGTCGGTGATGGGGTA-GAGATGGGCGGGCCCI |
|                    |  | :GGGAGCGGC-----GAGATGGGCGGGCCCI                                                                                      |
| T0 amplicons       |  | :GGGAGCGGC-TGGAGGCGCGGTTGAAGGGGAGGTGGAAGTTGGAGGCCTCGGAGAGGTAGGAGCGGGAGGCGAGCGCGGAGAGGTCGGTGATGGGGTA-GAGATGGGCGGGCCCI |
|                    |  | :GGGAGCGGC-----GAGATGGGCGGGCCCI                                                                                      |
| wildtype reference |  | :GGGAGCGGC-TGGAGGCGCGGTTGAAGGGGAGGTGGAAGTTGGAGGCCTCGGAGAGGTAGGAGCGGGAGGCGAGCGCGGAGAGGTCGGTGATGGGGTAGGAGATGGGCGGGCCCI |

**tA PAM** **t3 PAM**

## B426 T0 ENG1 contigs

|                    |  |                                      |
|--------------------|--|--------------------------------------|
|                    |  | :CGGAGAGGT-----GGCGGC                |
|                    |  | :CGGAGAGGTCGGTGATGGGGTAGGAGATGGGCGGC |
|                    |  | :CGGAGAGGT-----GGCGGC                |
| T0 amplicons       |  | :CGGAGAGGTCGGTGATGGGGTAGGAGATGGGCGGC |
|                    |  | :CGGAGAGGT-----GGCGGC                |
|                    |  | :CGGAGAGGT-----GGCGGC                |
| wildtype reference |  | :CGGAGAGGTCGGTGATGGGGTAGGAGATGGGCGGC |

**t2 PAM**



## B433 T0 ENG1 contigs

T0 amplicon GCGCCCCGGGAGA-----TGGCGGCGCCGGCC  
 wildtype reference GCGCCCCGGGAGAGGGGAGCGCGTGGAGCGCGGTTGAAGGGGAGGTGGAAGTTGGAGGCCICGGAGAGGTAGGAGCGGGAGGCGAGCGCGGAGAGGTGCGTGTATGGGTAGGAGATGGGCGGCGCCGGCC  
 tA PAM t3 PAM

T0 amplicons TCGGTGATGGG-----CGGCGCCGGC\  
 TCGGTGATGGG-----CGGCGCCGGC\  
 TCGGTGATGGG-----CGGCGCCGGC\  
 wildtype reference TCGGTGATGGG**GTAGGAGATGGG**CGGCGCCGGC\  
 t3 PAM

## B435 T0 ENG1 contigs

T0 amplicons TGGGGTAGGAGA-----GCGTCGAACGGCG  
 TGGGGTAGGAGATGGGCGGCGCCGGCCTGGAAGCGTCGAACGGCG  
 TGGGGTAGGAGATGGGCGGCGCCGGCCTGGAAGCGTCGAACGGCG  
 TGGGGTAGGAGATGGGCGGCGCCGGCCTGGAAGCGTCGAACGGCG  
 wildtype reference TGGGGTAGGAGATGGGCGGCGCCGGCCTGGAAGCGTCGAACGGCG  
 t2 PAM

## B436 T0 ENG1 contigs

T0 amplicons CATGACCCTGC-----CCTACCCCATCA  
 CATGACCCTGC-----CCTACCCCATCA  
 CATGACCCTGC-----CCTACCCCATCA  
 CATGACCCTGC-----CCTACCCCATCA  
 CATGACCCTGC**CCGCCCGGACGACGCCGCCCTCCGAAGGCGAGCGGCGGACTGGGAGCCGCCGTTTCGACGCTTCCAGGCCGGCGCCCTCT**-CCTACCCCATCA  
 CATGACCCTGC**CCGCCCGGACGACGCCGCCCTCCGAAGGCGAGCGGCGGACTGGGAGCCGCCGTTTCGACGCTTCCAGGCCGGCGCCCTCT**-CCTACCCCATCA  
 wildtype reference CATGACCCTGC**CCGCCCGGACGACGCCGCCCTCCGAAGGCGAGCGGCGGACTGGGAGCCGCCGTTTCGACGCTTCCAGGCCGGCGCCCTCT**-CCTACCCCATCA  
 t2 PAM

## B438 T0 ENG1 contigs

T0 amplicons  
 wildtype reference

```

  GTTCGACGCTTCCAGGCCGCGCCGCCATCTCCTACCCCATCACCGACCTCTCCGCGCTCGCCTCCCGCTCCTACCTCTCCGAGGCCTCCAACCTCCACCTCCCCTTCAACCGCGCCTCCA---CGCTCCCCTCTC|
  GTTCGACGCTTCC-GGCCGGCGCCGCCCATCTCCTACCCCATCACCGACCTCTCCGCGCTCGCCTCCCGCTCCTACCTCTCCGAGGCCTCCAACCTCCACCTCCCCTTCAACCGCGCCTCCAACGCCGCTCCCCTCTC|
  GTTCGACGCTT-CAGGCCGCGCCGCCATCTCCTACCCCATCACCGACCTCTCCGCGCTCGCCTCCCGCTCCTACCTCTCCGAGGCCTCCAACCTCCACCTCCCCTTCAACCGCGCCTCCA--GCCGCTCCCCTCTC|
  GTTCGACGCTTCT-GGCCGGCGCCGCCCATCTCCTACCCCATCACCGACCTCTCCGCGCTCGCCTCCCGCTCCTACCTCTCCGAGGCCTCCAACCTCCACCTCCCCTTCAACCGCGCCTCCA--GCCGCTCCCCTCTC|
  GTTCGACGCTTCCAGGCCGCGCCGCCATCTCCTACCCCATCACCGACCTCTCCGCGCTCGCCTCCCGCTCCTACCTCTCCGAGGCCTCCAACCTCCACCTCCCCTTCAACCGCGCCTCCAAC-GCCGCTCCCCTCTC|
  
```

t1 PAM tA PAM

## B439 T0 ENG1 contigs

T0 amplicons  
 wildtype reference

```

  AGCGGCGCCCCGG-----AAGCGTCGAACGG|
  AGCGGCGCCCCGGGA-----TGGCGGCGCCGGCCTGGAAGCGTCGAACGG|
  AGCGGCGCCCCGGGAGA-----TGGCGGCGCCGGCCTGGAAGCGTCGAACGG|
  AGCGGCGCCCCGGGAGA-----TGGCGGCGCCGGCCTGGAAGCGTCGAACGG|
  AGCGGCGCCCCGGGAGA-----TGGCGGCGCCGGCCTGGAAGCGTCGAACGG|
  AGCGGCGCCCCGGGAGA-----TGGCGGCGCCGGCCTGGAAGCGTCGAACGG|
  AGCGGCGCCCCGGGAGA-----TGGCGGCGCCGGCCTGGAAGCGTCGAACGG|
  AGCGGCGCCCCGGGAGA-----TGGCGGCGCCGGCCTGGAAGCGTCGAACGG|
  AGCGGCGCCCCGGGAGAGGGGAGCGCGTGAAGGGGAGGTGGAAGTTGGAGGCCTCGGAGAGGTAGGAGCGGGAGGCGAGCGCGGAGAGGTCGGTGATGGGGTAGGAGATGGGCGGCGCCGGCCTGGAAGCGTCGAACGG|
  
```

tB PAM t3 PAM

## B440 T0 ENG1 contigs

T0 amplicons  
 wildtype reference

```

  ;AGGGGAGCGG-----AGGCGCGGTTGAAGGGGAGGTGGAAGTTGGAGGCCTCGGAGAGGTAGGAGCGGGAGGCGAGCGCGGAGAGGTCGGTGATGGGGTAGGAGATGGGCGGCGCCGGCC-GGAAGCGTCGAACG|
  ;AGGGGAGCGGCGTGGAGGCGCGGTTGAAGGGGAGGTGGAAGTTGGAGGCCTCGGAGAGGTAGGAGCGGGAGGCGAGCGCGGAGAGGTCGGTGATGGGGTAGGAGATGGGCGGCGCCGGCCTGGAAGCGTCGAACG|
  ;AGGGGAGCGGCGTGGAGGCGCGGTTGAAGGGGAGGTGGAAGTTGGAGGCCTCGGAGAGGTAGGAGCGGGAGGCGAGCGCGGAGAGGTCGGTGATGGGGTAGGAGATGGGCGGCGCCGGCCTGGAAGCGTCGAACG|
  ;AGGGGAGCGGCGTGGAGGCGCGGTTGAAGGGGAGGTGGAAGTTGGAGGCCTCGGAGAGGTAGGAGCGGGAGGCGAGCGCGGAGAGGTCGGTGATGGGGTAGGAGATGGGCGGCGCCGGCCTGGAAGCGTCGAACG|
  ;AGGGGAGCGGCGTGGAGGCGCGGTTGAAGGGGAGGTGGAAGTTGGAGGCCTCGGAGAGGTAGGAGCGGGAGGCGAGCGCGGAGAGGTCGGTGATGGGGTAGGAGATGGGCGGCGCCGGCCTGGAAGCGTCGAACG|
  ;AGGGGAGCGGCGTGGAGGCGCGGTTGAAGGGGAGGTGGAAGTTGGAGGCCTCGGAGAGGTAGGAGCGGGAGGCGAGCGCGGAGAGGTCGGTGATGGGGTAGGAGATGGGCGGCGCCGGCCTGGAAGCGTCGAACG|
  ;AGGGGAGCGGCGTGGAGGCGCGGTTGAAGGGGAGGTGGAAGTTGGAGGCCTCGGAGAGGTAGGAGCGGGAGGCGAGCGCGGAGAGGTCGGTGATGGGGTAGGAGATGGGCGGCGCCGGCCTGGAAGCGTCGAACG|
  ;AGGGGAGCGGCGTGGAGGCGCGGTTGAAGGGGAGGTGGAAGTTGGAGGCCTCGGAGAGGTAGGAGCGGGAGGCGAGCGCGGAGAGGTCGGTGATGGGGTAGGAGATGGGCGGCGCCGGCCTGGAAGCGTCGAACG|
  
```

tA PAM t1 PAM

## B442 T0 ENG1 contigs

T0 amplicons  
 wildtype reference

```

  GCGGCGGGAGCGGCGCCCCGGGAGAGGGGAGCGGC|
  GCGGCGGGAGCGGCGCCCCGGGAGAGGGGAGCGGC|
  GCGGCGGGAGC-----GGAGAGGGGAGCGGC|
  GCGGCGGGAGCGGCGCCCCGGGAGAGGGGAGCGGC|
  GCGGCGGGAGCGGCGCCCCGGGAGAGGGGAGCGGC|
  GCGGCGGGAGCGGCGCCCCGGGAGAGGGGAGCGGC|
  
```

t2 PAM
