# Supplementary material for: Heritable Genomic Fragment Deletions and Small Indels in the Putative ENGase Gene Induced by CRISPR/Cas9 in Barley
Source: PubMed Central journal article supplement (PMC5404177; doi:10.3389/fpls.2017.00540), 2017-04-25
Supplement: Image_1.pdf [file Image_1.pdf]

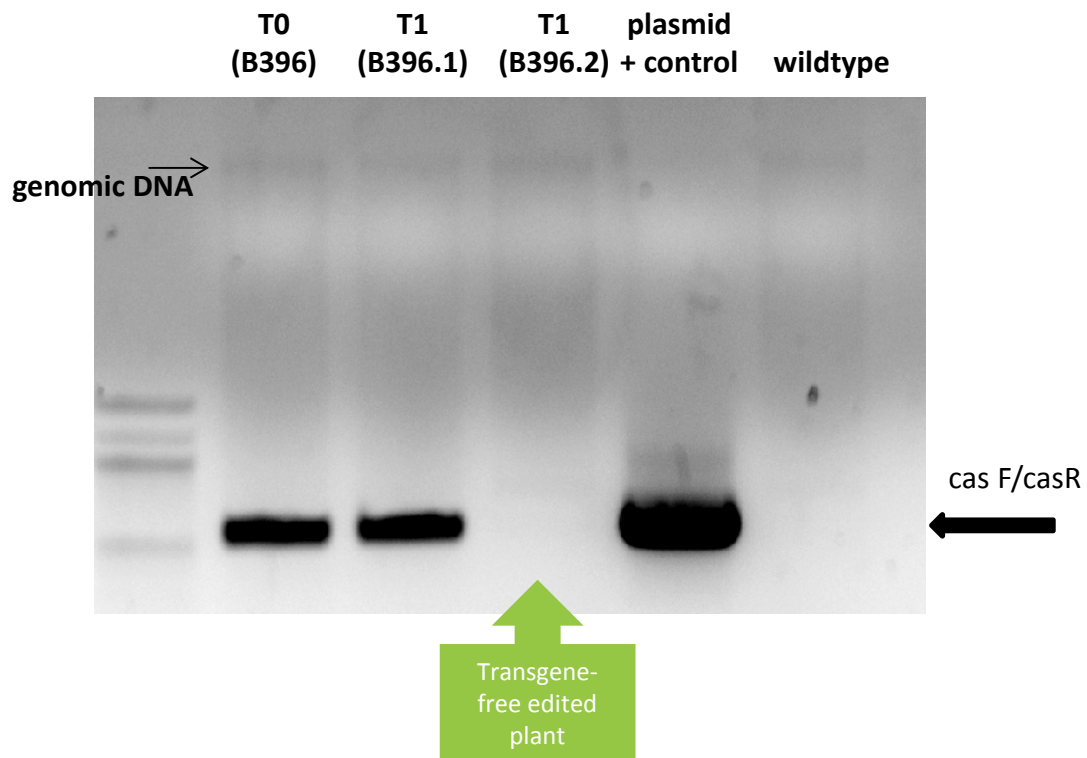

Figure S1. T1 plants were tested for the presence of the *cas9* gene using primers Cas-F and Cas-R (Table 1).
